# Supplementary material
Source: publisher figshare collection journal article supplement (https://gsapubs.figshare.com/ndownloader/files/23303702)
Supplement: Supplementary file 1 [file 23303702]

## Supplementary Information 1

### Past changes in the North Atlantic storm track driven by insolation and sea ice forcing

#### **Study site descriptions**

The study sites of northwest Spain and northwest Scotland were selected as these regions are highly influenced by the NAO during the instrumental period; storminess is higher/lower during a negative/positive NAO in northwest Spain, with the opposite relationship in northwest Scotland (Andrade et al., 2008).

#### Pedrido Bog

Pedrido Bog is an ombrotrophic peat bog situated in the Xistral Mountains of northwest Spain (43.4503 N, 7.5292 W; 770 m altitude). The Xistral Mountains is an upland area around 600-800 m a.s.l. with some peaks over 1000 m. The site is a raised ombrotrophic mire situated in a bedrock depression in the lee of higher ground.

The Pedrido Bog surface vegetation consists of *Calluna vulgaris*, *Eriophorum vaginatum*, *Erica makaiana*, *Molinia caerulea*, *Gentiana pneumonanthe*, *Potentilla erecta*, *Carex echinata*, *Carex sp*, *Sphagnum sp*, *Narthecium ossifragum*, *Parnassia palustris*, *Potamogeton*, *Succisa pratensis* and *Drosera rotundifolia*. The surrounding slopes have *Ilex aquifolium*, *Castanea sativa*, *Eucalyptus* and *Pinus pinaster* with *Pinus radiata* higher up.

Land-use in the area is currently limited to free livestock grazing at higher altitudes, with wind farms constructed in recent years, while on lower slopes there is intensive agriculture and livestock grazing (Díaz Varela et al., 2008). Recently plantations of *Pinus pinaster* and *Eucalyptus* have developed.

The sampled core consists of highly decomposed sedge and grass dominated peat. Organic Bulk Density changes (data not shown) showed higher values over 0.12 g cm<sup>-2</sup> at 4000-2500 cal yrs BP and after 500 cal yrs BP, with lower values between these periods, which indicates changes in the humification through the core.

#### Outer Hebrides Bogs

Struban Bog (57.5597 N, 7.3458 W) and Hill Top Bog (57.1681 N, 7.3478 W) are two ombrotrophic peat bogs situated on the western side of the Outer Hebrides, Scotland. The western coastline of the islands has sandy machair grasslands, sand dunes and beaches, and to the east of this are soils consisting of peaty gleys, peaty podzols and raised peat bogs (Angus 1997, Hudson 1991). The two bogs are in close proximity to the sand sources along the coast. The two sites are approximately 40 km apart; Struban Bog is on North Uist and Hill Top Bog is on South Uist. The bogs are situated in rural locations: there are small settlements (villages and farms) and the land use is predominantly livestock grazing or open land that is not currently in use.

Each peat core had similar composition, consisting of humified sedge dominated peat with small amounts of *Sphagnum*. The age-depth model of Hill Top Bog is constrained by 7 AMS radiocarbon dates spanning the 3.3 m core, while Struban Bog is constrained by 6 AMS radiocarbon dates along the 3 m core. The Organic Bulk Density of Struban Bog increases after 1500 cal yrs BP, while the density of Hill Top Bog shows no trend but centennial variability. See Orme et al (2016) for further details.

## Bibliography

- Andrade, C., Trigo, R., Freitas, M., Gallego, M., Borges, P., and Ramos, A., 2008, Comparing historic records of storm frequency and the North Atlantic Oscillation (NAO) chronology for the Azores region: *The Holocene*, v. 18, no. 5, p. 745-754.
- Angus, S., 1997, *The Outer Hebrides: the shaping of the islands*, White Horse Press.
- Hudson, G., 1991, *The geomorphology and soils of the Outer Hebrides: Flora of the Outer Hebrides*, p. 19-27.
- Orme, L.C., Reinhardt, L., Jones, R.T., Charman, D.J., Barkwith, A., and Ellis, M.A., 2016, Aeolian sediment reconstructions from the Scottish Outer Hebrides: Late Holocene storminess and the role of the North Atlantic Oscillation: *Quaternary Science Reviews*, v. 132, p. 15–25, doi:10.1016/j.quascirev.2015.10.045.
- Varela, R. D., Rego, P. R., Iglesias, S. C., and Sobrino, C. M., 2008, Automatic habitat classification methods based on satellite images: A practical assessment in the NW Iberia coastal mountains: *Environmental Monitoring and Assessment*, v. 144, no. 1-3, p. 229-250.

TABLE DR1. PEDRIDO BOG RADIOCARBON DATES

| Midpoint<br>sample depth<br>(cm) | Laboratory<br>code | <sup>14</sup> C age<br>(yrs BP) | Error<br>(yrs) |
|----------------------------------|--------------------|---------------------------------|----------------|
| 20.5                             | GrA-30387          | 360                             | 45             |
| 24.5                             | GrA-26807          | 370                             | 30             |
| 30.5                             | GrA-30464          | 540                             | 35             |
| 37.5                             | GrA-30454          | 665                             | 35             |
| 44.5                             | GrA-30466          | 795                             | 35             |
| 56.5                             | GrA-30467          | 945                             | 35             |
| 60.5                             | GrA-26809          | 940                             | 30             |
| 70.5                             | GrA-30402          | 1130                            | 50             |
| 80.5                             | GrA-30468          | 1260                            | 35             |
| 90.5                             | GrA-26810          | 1190                            | 35             |
| 96.5                             | GrA-30459          | 1460                            | 35             |
| 99.5                             | GrA-30460          | 1580                            | 35             |
| 129.5                            | GrA-30455          | 1955                            | 35             |
| 139.5                            | GrA-30410          | 2080                            | 50             |
| 143.5                            | GrA-26854          | 2220                            | 40             |
| 151.5                            | GrA-30406          | 2290                            | 50             |
| 153.5                            | GrA-30408          | 2330                            | 50             |
| 157.8                            | GrA-30403          | 2480                            | 50             |
| 159.5                            | GrA-30409          | 2600                            | 50             |
| 162.5                            | GrA-26811          | 2715                            | 35             |
| 167.5                            | GrA-30448          | 2865                            | 40             |
| 175.5                            | GrA-30449          | 3050                            | 40             |
| 216.5                            | GrA-26800          | 3640                            | 45             |
| 220.5                            | GrA-30462          | 3555                            | 40             |
| 222.5                            | GrA-30486          | 3725                            | 40             |
| 230.5                            | GrA-30404          | 3720                            | 50             |
| 233.5                            | GrA-30487          | 3795                            | 35             |
| 235.5                            | GrA-30450          | 3805                            | 40             |
| 237.5                            | GrA-30452          | 3945                            | 40             |
| 248.5                            | GrA-25192          | 4155                            | 40             |

TABLE DR2. PEDRIDO BOG  $^{210}\text{Pb}$  DATES

| Depth<br>(cm) | Unsupported<br>$^{210}\text{Pb}$ activity<br>(count $\text{d}^{-1} \text{g}^{-1}$ ) | Date<br>(A.D.) | Error<br>(yrs) |
|---------------|-------------------------------------------------------------------------------------|----------------|----------------|
| 0.5           | 438                                                                                 | 2002           | 6              |
| 2.5           | 560                                                                                 | 1995           | 4              |
| 4.5           | 491                                                                                 | 1982           | 5              |
| 6.5           | 290                                                                                 | 1963           | 6              |
| 8.5           | 180                                                                                 | 1944           | 8              |
| 10.5          | 88                                                                                  | 1920           | 13             |
| 12.5          | 69                                                                                  | 1896           | 24             |
| 14.5          | 9                                                                                   | 1825           | 96             |
